# Supplementary material
Source: PubMed Central journal article supplement (PMC7275735)
Supplement: pnas.2005394117.sapp.pdf [file pnas.2005394117.sapp.pdf]

# PNAS

[www.pnas.org](http://www.pnas.org)

Supplementary Information for

**Kinetochores protein Spindly controls microtubule polarity in *Drosophila* axons**

Urko del Castillo\*, Hans-Arno J. Müller, Vladimir I. Gelfand\*

Urko del Castillo

[urko@northwestern.edu](mailto:urko@northwestern.edu)

Vladimir I. Gelfand

[vgelfand@northwestern.edu](mailto:vgelfand@northwestern.edu)

**This PDF file includes:**

Figures S1 to S3

Table S1

Video legends

SI Reference

**Figure S1**

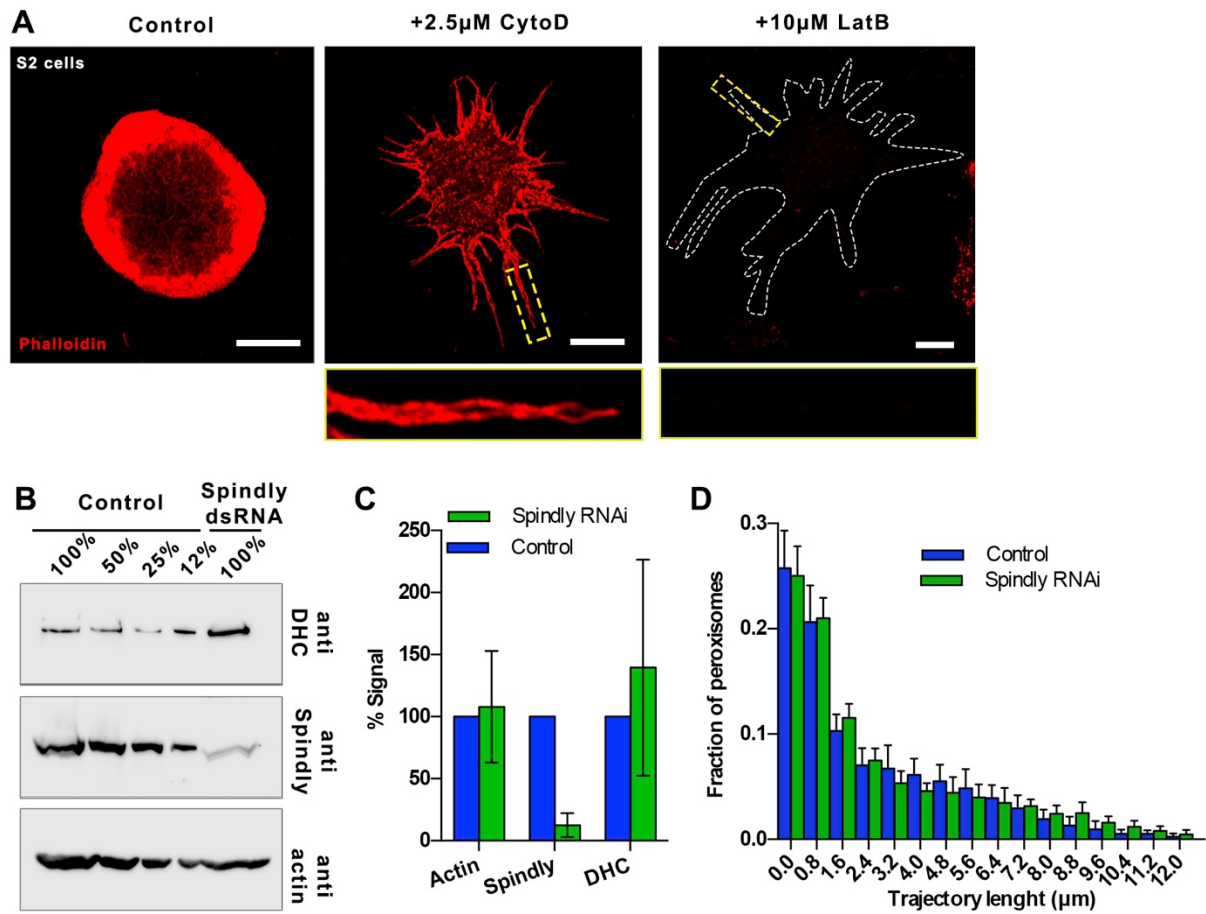

**Figure S1. Spindly knockdown does not alter DHC levels.**

A) Low concentration of CytoD (2.5µM) does not depolymerize cortical actin of S2 processes. S2 cells were plated in the absence of drugs (control) or 2.5µM CytoD or 10µM LatB. F-actin was stained with Rhodamine-Phalloidin. The concentration of CytoD used in the S2 candidate-based screen (2.5 µM) allowed the formation of microtubule-base processes containing cortical actin. In contrast, treatment with high concentration of LatB induced actin depolymerization. Images were taken using the same microscope settings. Scale bars, 10 µm.

B) Representative western blots of the S2 lysates of untreated (control) and treated with Spindly shRNA. Dilutions of untreated lysates were provided to estimate degree of knockdown.

C) Protein levels were quantified using the western-blot in (B). Data obtained from three independent assays.

D) Trajectory length of peroxisome transport in S2 cells untreated (control) and Spindly RNAi (see Video 2).

## Figure S2

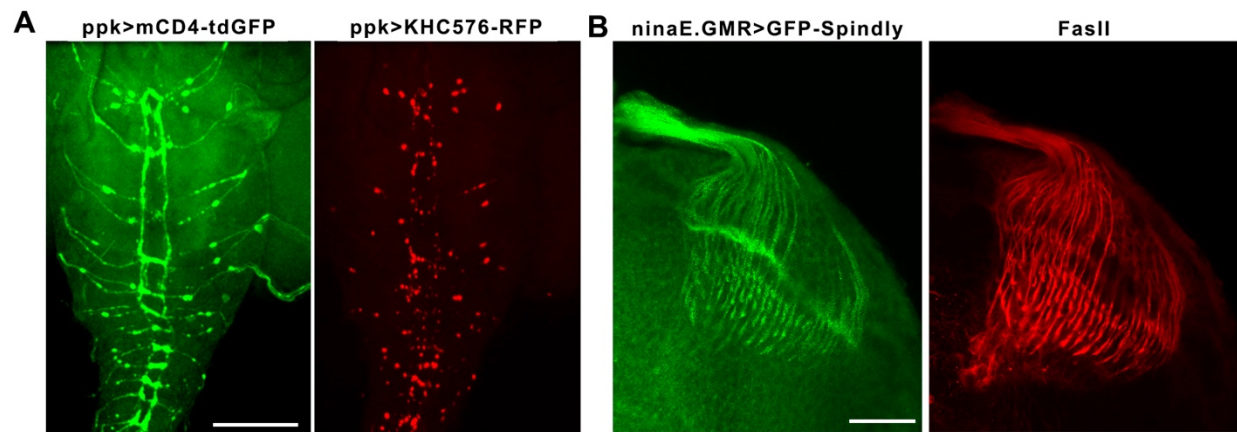

### Figure S2. KHC(1-576)-RFP accumulated at the tips of axons in class IV *Da* neurons

A) Confocal z-projection of a fixed third-instar VNC expressing mCD4-tdGFP (left panel) and KHC(1-576)-RFP (red panel) driven by *ppk-gal4*. Note that KHC(1-576) accumulates at the tips of the axons in class IV neurons. Scale bar, 40  $\mu\text{m}$ .

B) Confocal z-projection of a fixed third-instar optic lobe expressing *ninaE.GMR>GFP-SpindlyFL* (left panel) and immunostained with FasII (right panel). Scale bar, 20  $\mu\text{m}$ .

**Figure S3**

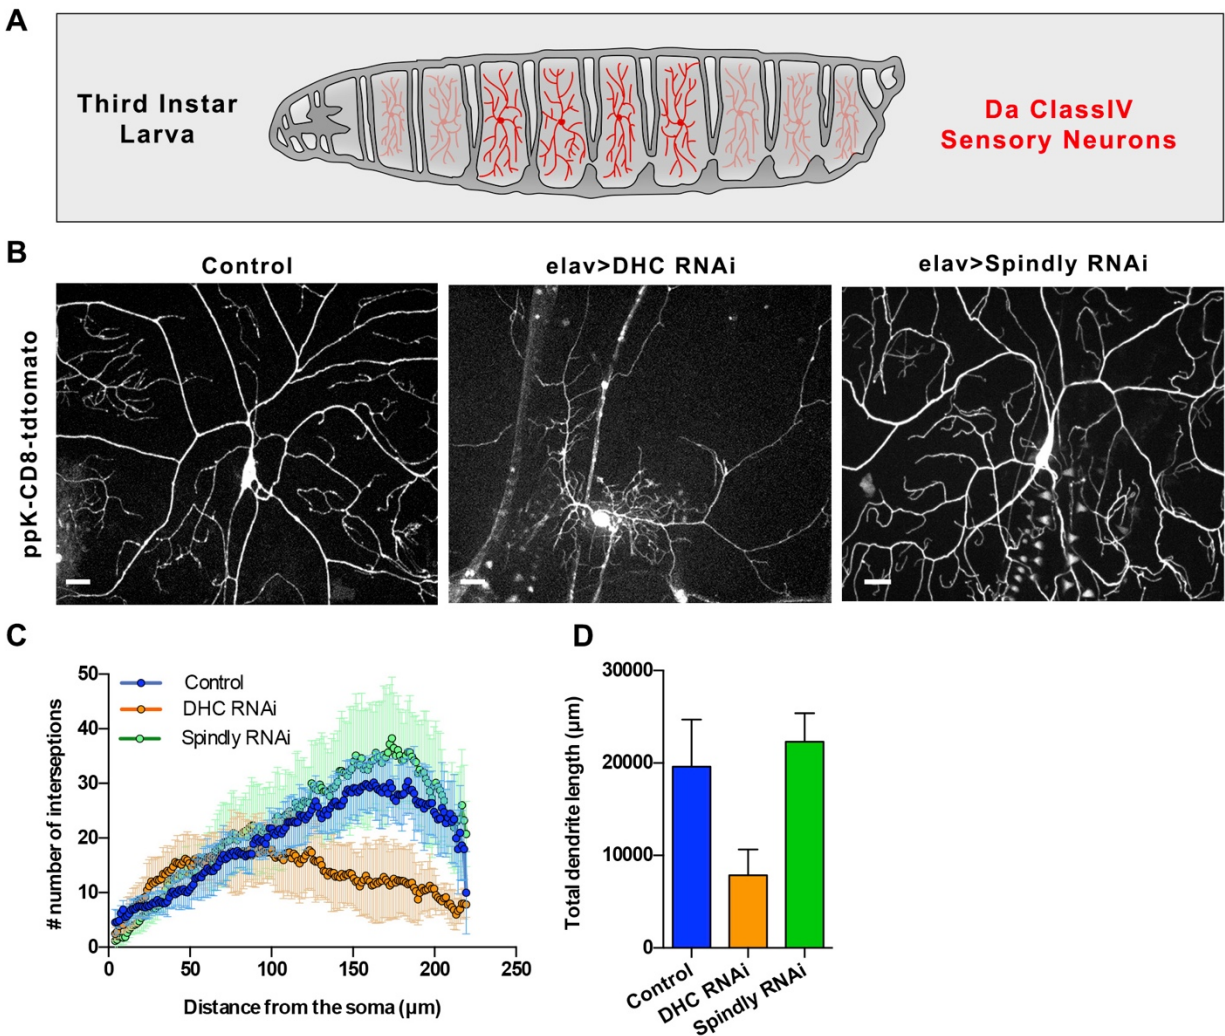

**Figure S3. Spindly does not affect development of dendrites**

A) Diagram of third-instar larva showing the class IV Da sensory neurons in red.

B) Representative max-projection images showing DA neurons labelled with ppk::tdTomato in 3rd instar larvae under control conditions (left panel), DHC RNAi (middle panel) or Spindly RNAi (Left panel). Scale bars, 20  $\mu\text{m}$ .

C) Sholl analysis of dendritic arborization of class IV sensory neurons. Data obtained from 12, 13 and 10 animals for control, DHC RNAi and Spindly RNAi, respectively.

D) Quantification of the total dendritic length of Da neurons from data obtained in (C).

## **Video legends**

**Video 1.** Time-lapse of control (untreated cell) or Spindly RNAi S2 cells expressing EB1-GFP. Scale bar, 10  $\mu\text{m}$ . Related to Fig. 1D.

**Video 2.** Time-lapse of control (untreated cell) or Spindly RNAi S2 cells expressing SKL-GFP. Scale bar, 10  $\mu\text{m}$ . Related to Fig. S1D.

**Video 3.** Time-lapse of primary neurons expressing Ubi-EB1-mCherry of three different genotypes. Control (elav-Gal4), DHC RNAi (elav>DHC shRNA) and Spindly RNAi (elav>Spindly shRNA). Scale bar, 10  $\mu\text{m}$ . Related to Fig. 3A.

**Video 4.** Motility assay of control (elav-Gal4) and elav>Spindly RNAi adult flies in a 35 mm dish. Related to Fig. 4G and 4I.

**Video 5.** Climbing assay of adult flies with different genotypes. From left to right: Control (elav-Gal4), Spindly RNAi (elav>Spindly RNAi). Related to Fig. 4H.

**Table S1.**

|                                   |         |                               | T7 promoter sequence (TAATACGACTCACTATAGGG) were added to 5' end of each primer. |                                     |
|-----------------------------------|---------|-------------------------------|----------------------------------------------------------------------------------|-------------------------------------|
|                                   | CG      | Expression levels in S2 cells | Primer 1 (5'-3')                                                                 | Primer 2 (5'-3')                    |
| <b>Axon Initial Segment</b>       |         |                               |                                                                                  |                                     |
| $\alpha$ -spectrin                | CG1977  | Very high                     | AGCGCGATGCCGACGAGTTGGAGTC                                                        | ACGCGATACTCTGGGAGGCCATG             |
| $\beta$ -spectrin                 | CG5870  | Moderate-high                 | AGCGCTTGAGAAATGCCGTCGAGTAC                                                       | ACTCAATGTAGAAGGTCTGGACGCCATG        |
| Ankyrin                           | CG1651  | Moderate                      | AGTGCCCCAGGTCAAAGCTATATTTCCG                                                     | TCAAGGGTCTTATCCTCTTTATCATCAGTCATGCA |
| <b>Asymmetrical Cell Division</b> |         |                               |                                                                                  |                                     |
| Inscutable                        | CG11312 | Very low                      | GATTCGGGCTTCTCGGACAAT                                                            | CGGGCGTTTGCTGCTTATC                 |
| Pins                              | CG5692  | Moderate-high                 | TGTCTCGCTCTCTGCGTCCG                                                             | AGGTGCCTCTCGCAACAGATG               |
| Gi-alpha                          | CG10060 | Very high                     | GAAGATCATCCATGACACGGGCTAC                                                        | AGTTCCGGTTGCGCGATCCTATCCAG          |
| Mud                               | CG12047 | Moderate                      | TCATCGAATCGAACTACATTACCTTG                                                       | TCATCGAATCGAACTACATTACCTTG          |
| Numb                              | CG3779  | Very low                      | TCATCGAATCGAACTACATTACCTTG                                                       | GTTGTTGAAGTTTAGATCCTCGCCGGCG        |
| Bazooka                           | CG5055  | Very low                      | AGCGAGGTCAACGAGGAGGTGGAAG                                                        | AGCACTCGACAAATTGATAGCGCTTTACGG      |
| Cdc42                             | CG12530 | Very high                     | AGGCCGTCAAAGTACGTGGAGTGCTC                                                       | GACACTACTGACACAGATACGCGG            |
| Khc73                             | CG8183  | Moderate                      | CTAACCGACCGCCTGAAGA                                                              | CTCCAAAGCTGTGGGACTT                 |
| <b>Cell Adhesion</b>              |         |                               |                                                                                  |                                     |
| Abl                               | CG4032  | Moderate high                 | AAGAGAGAGAGGTGAAGCCAGAGGCG                                                       | TTCTCTCTTCTCTCGGCTCCTGCTG           |
| Aplip1                            | CG1200  | Very low                      | GAGTTCGCCAACGGTGGTGGTGG                                                          | GGATCCGAGGTAGCCACAGATAGC            |
| Armadillo                         | CG11579 | Very high                     | CGACTCCGGCATCCACTCGGGTG                                                          | ATCTGAGGGCTGTTCCATAATGGCATGTC       |
| Shaggy                            | CG2621  | Low                           | AATACAGCCCAGCCTAGTGCCG                                                           | GTTGACGAGACGCTGGTGGAGCC             |
| <b>Kinetochores</b>               |         |                               |                                                                                  |                                     |
| Spindly                           | CG15415 | Moderate                      | GACACCCTTAGCGTGGATGACATCGTG                                                      | TCAGCCACCGCCAGAGTGTTTGC             |
| Rod1                              | CG1569  | Moderate                      | TGTCAACGCACTGCAGGATCTTTCTG                                                       | TAGTGATCAGGCCAGGGCACAGG             |
| <b>Apical/Basal polarity</b>      |         |                               |                                                                                  |                                     |
| Yurt                              | CG9764  | Moderate                      | ACGCATCGTGGTCAACAAGAACAATCG                                                      | ATGCTCCTGATTGTCATAGTCGCCAG          |
| Tao                               | CG14217 | Moderate-high                 | AGCCAGACATGAAGATCAACCTCCGTATG<br>G                                               | ACCAGTCAGCACTCCATCACGCACATAC        |
| <b>Actin-related proteins</b>     |         |                               |                                                                                  |                                     |
| Short Stop                        | CG18076 | Low                           | CAAATCCGTCAGATCGTGCTC                                                            | CTTGCTCTCAAAGTGCCTC                 |
| Arpc4 (Arp2/3 complex sub4)       | CG5972  | Very High                     | GATTGAGCGCATACTGTGCC                                                             | CTCCGTGTGGAAGTTGGTGA                |
| Arp5                              | CG7940  | Moderate                      | TCGAGCGAATGTGATAACCA                                                             | TTGTCTGTCCATCGAATCCC                |

**Table S1.** Genes tested in the candidate-based RNAi screen in S2 cells. Expression levels of these genes in S2 cells were obtained from (1).

## SI Reference

1. L. Cherbas *et al.*, The transcriptional diversity of 25 *Drosophila* cell lines. *Genome Res* **21**, 301-314 (2011).
